# Supplementary material
Source: Springer Nature journal article supplement (https://www.springermedizin.de/resource/supplementary/12985_2010_948_MOESM2_ESM.pdf/9608804)

**1****2****3****4****5****6****7****8**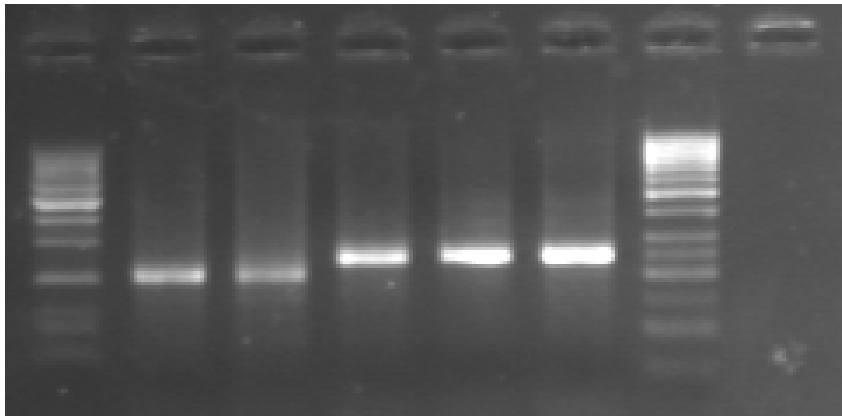

Supplement: MOESM2 [file 9608804]
